# Supplementary material
Source: publisher figshare collection journal article supplement (https://acs.figshare.com/ndownloader/files/4325290)
Supplement: Supplementary file 1 [file 4325290]

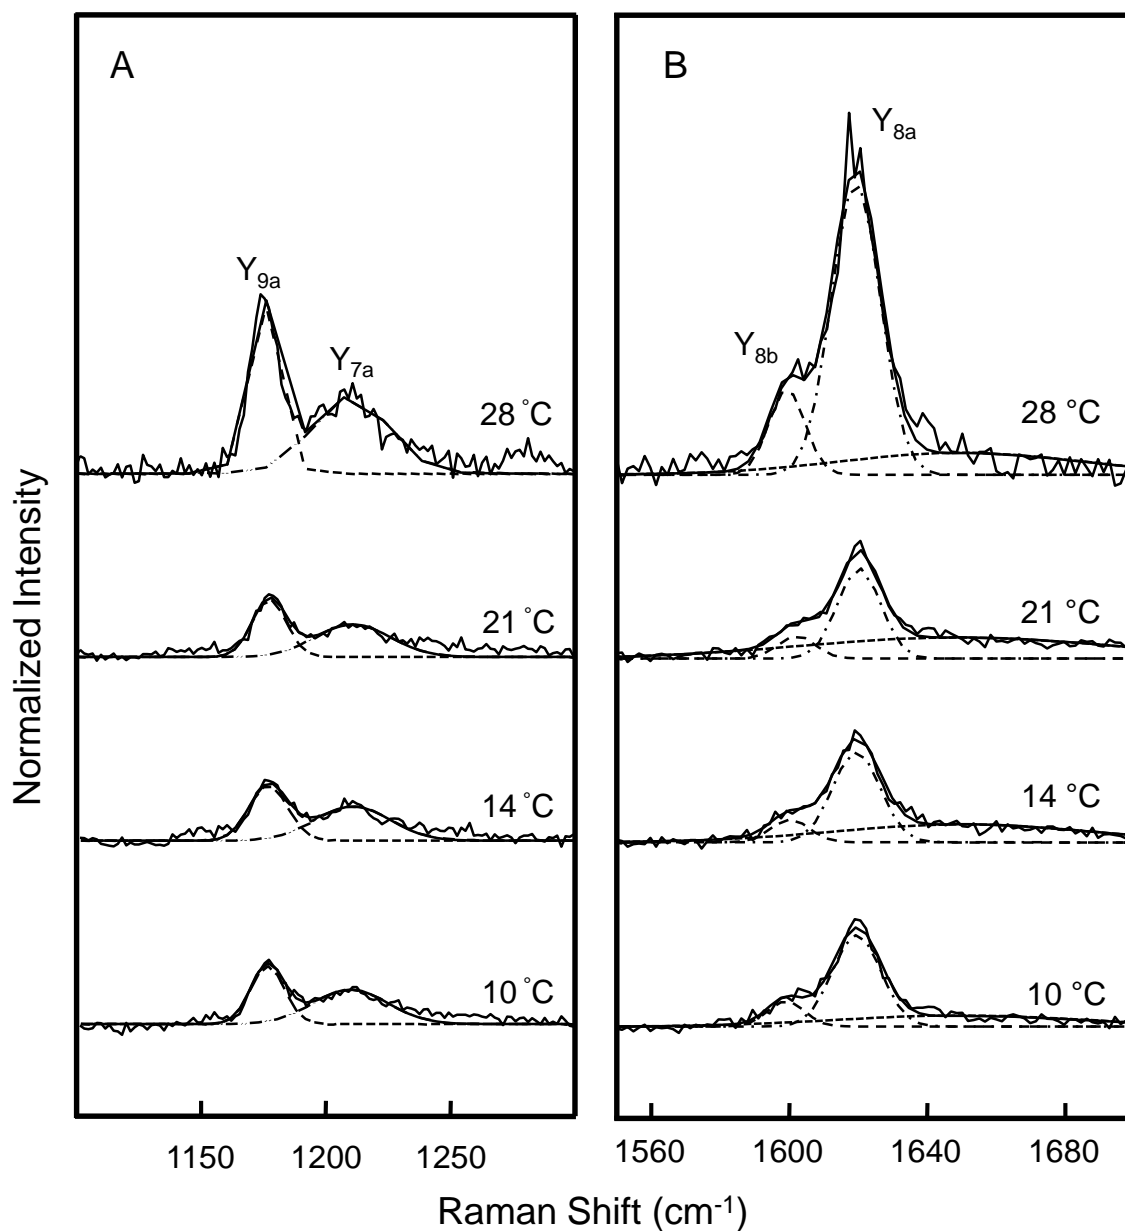

**Figure 1.** Deconvolution of the Tyr peaks in the spectrum of TTR (105-115) in 40% v/v acetonitrile/water as a function of temperature at 239.5 nm excitation. (A) (dashed line) Y<sub>9a</sub> 1178 cm<sup>-1</sup>, (dot-dot-dashed line) Y<sub>7a</sub> 1210 cm<sup>-1</sup>, and (solid line) sum of all components. (B) (dashed line) Y<sub>8b</sub> 1602 cm<sup>-1</sup>, (dot-dot-dashed line) Y<sub>8a</sub> 1620 cm<sup>-1</sup>, (dotted line) bend mode of water at 1650 cm<sup>-1</sup>, and (solid

line) sum of all components.
